# Supplementary material for: Cardamonin targets KEAP1/NRF2 signaling for protection against atherosclerosis
Source: Royal Society of Chemistry journal article supplement (doi:10.1039/d3fo00967j), 2023-01-01
Supplement: d3fo00967j1.pdf [file d3fo00967j1.pdf]

**Table S1 Sequences of primers**

| Gene          | Species | Primers | Sequences              | Product sizes (bp) |
|---------------|---------|---------|------------------------|--------------------|
| <i>AHR</i>    | human   | forward | GTCACATCGAGAGCCCAGTC   | 127                |
|               |         | reverse | AGTCCTCCCAAACCTTGCTC   |                    |
| <i>HMOX1</i>  | human   | forward | GGCAGAGGGTGATAGAAGAGG  | 73                 |
|               |         | reverse | AGTCCTGCAACTCCTCAAA    |                    |
| <i>ICAM-1</i> | human   | forward | GGCCTCAGTCAGTGTGA      | 217                |
|               |         | reverse | AACCCCATTCAGCGTCA      |                    |
| <i>Icam-1</i> | mouse   | forward | GCTACCATCACCGTGTATTCG  | 80                 |
|               |         | reverse | AGGTCCTTGCCTACTTGCTG   |                    |
| <i>NFE2L2</i> | human   | forward | CATGATGGACTTGGAGTTGC   | 76                 |
|               |         | reverse | CCTCAAAGGATGTCAATCAA   |                    |
| <i>Nos2</i>   | mouse   | forward | TGCCTCTCACTCTTCCTTGG   | 67                 |
|               |         | reverse | CCCAAAGTGCTTCAGTCAGG   |                    |
| <i>Nox4</i>   | mouse   | forward | CTTGGTGAATGCCCTCAACT   | 89                 |
|               |         | reverse | TTCTGGGATCCTCATTCTGG   |                    |
| <i>SELE</i>   | human   | forward | GGTGCATCTGGGGAAGTAGA   | 69                 |
|               |         | reverse | CCAGAGACCCGAGGAGAGTT   |                    |
| <i>Sele</i>   | mouse   | forward | TCAGTGGCTGCCGAAGTATT   | 69                 |
|               |         | reverse | TGGATCTCATGCTGGCTTCA   |                    |
| <i>VCAM-1</i> | human   | forward | GGTGGAGTGCAAACAGGACT   | 86                 |
|               |         | reverse | CAATAGCCAAGTGCCAGACC   |                    |
| <i>Vcam-1</i> | mouse   | forward | TCTTACCTGTGCGCTGTGAC   | 86                 |
|               |         | reverse | ACTGGATCTTCAGGGAATGAGT |                    |

Fig. S1

A

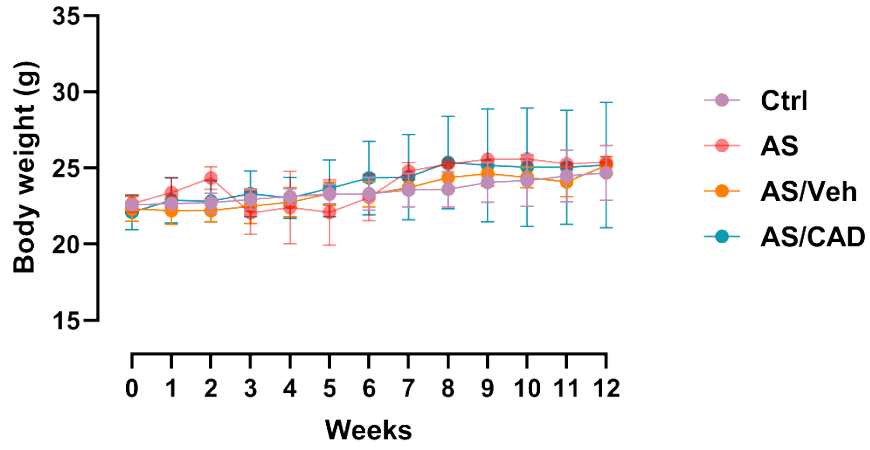

B

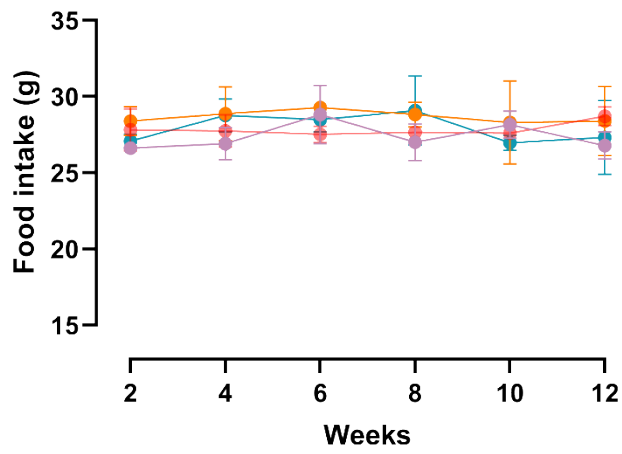

C

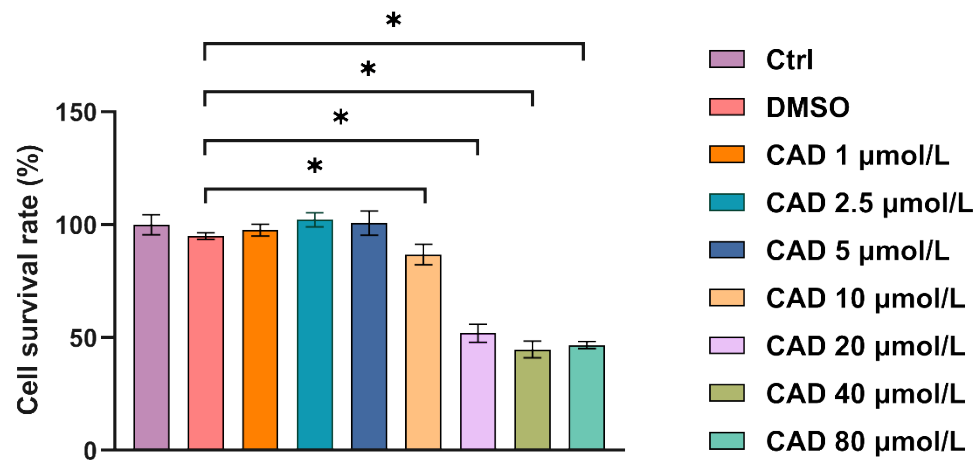

## Figure Caption

**Figure S1. Supplementary information for animal and cell experiments.** (A) Body weight and (B) food intake were recorded every one and two weeks, respectively. (C) Cell viability assay determining cell survival rate in the presence of DMSO and a series of doses of CAD. The data were presented as means  $\pm$  SD. \*,  $P < 0.05$  vs. Ctrl. Abbreviations: AS, atherosclerosis; CAD, cardamonin; Ctrl, control; Veh, the vehicle sodium carboxymethyl cellulose.
